# Supplementary material for: Comparison of Next-Generation Sequencing Technologies for Comprehensive Assessment of Full-Length Hepatitis C Viral Genomes
Source: PubMed Central journal article supplement (PMC5035407; doi:10.1128/jcm.00330-16), 2016-09-23
Supplement: JCM.00330-16_zjm999095136so1.pdf [file JCM.00330-16_zjm999095136so1.pdf]

## Supplementary Data

**Table S1: HCV genotypes and subtypes in the evaluation panel**

A) Genotype and viral loads of *single genotype samples*

| Sample   | VL <sup>1</sup> - IU/ml | Genotype <sup>2</sup> | G-Meta          | O-Meta | G-SSel | O-Capt         | G-Nimb         | U-Capt          | P-PCR           | Ampl. <sup>3</sup> |
|----------|-------------------------|-----------------------|-----------------|--------|--------|----------------|----------------|-----------------|-----------------|--------------------|
| sP528652 | 19,256                  | 1b                    | 1b              | 1b     | 1b     | 1b             | 1b             | 1b              | 1b              | 1b                 |
| sP915548 | 242,190                 | 1a                    | 1a <sup>3</sup> | 1a     | 1a     | 1a             | 1a             | 1a              | 1a              | 1a                 |
| sP883026 | 1,640,152               | 1b                    | 1b              | 1b     | 1b     | 1b             | 1b             | 1b              | 1b              | 1b                 |
| sP824545 | 195,214                 | 1a                    | 1a              | 1a     | 1a     | 1a             | 1a             | 1a              | 1a              | 1a                 |
| sP731482 | 1,447,136               | 4                     | 4a              | 4a     | 4a     | 4a             | 4a             | 4a              | 4a              |                    |
| sP495677 | 1,782,930               | 1a                    | 1a              | 1a     | 1a     | 1a             | 1a             | 1a              | 1a              | 1a                 |
| sP312482 | 335,842                 | 4                     | 4d              | 4d     | 4d     | 4d             | 4d             | 4d              | 4d              |                    |
| sP841485 | 1,795,374               | 1b                    | 1b              | 1b     | 1b     | 1b             | 1b             | 1b              | 1b              |                    |
| sP237998 | 425,444                 | 1a                    | 1a              | 1a     | 1a     | 1a             | 1a             | 1a              | 1a              | 1a                 |
| sP256432 | 877,020                 | 1a                    | 1a              | 1a     | 1a     | 1a             | 1a             | 1a              | 1a              | 1a                 |
| sP104509 | 18,214                  | 1a                    | 1a              | 1a     | 1a     | 1a             | 1a             | 1a              | 1a              |                    |
| sP546783 | 2,230                   | 3                     | 3a              | 3a     | 3a     | 3a             | 3 <sup>4</sup> | 3a              | 3a              |                    |
| sP643870 | 402,416                 | 1a                    | 1a              | 1a     | 1a     | 1a             | 1a             | 1a              | 1a              | 1a                 |
| sP575531 | 17,838                  | 3                     | 3a              | 3a     | 3a     | 3a             | 3a             | 3a              | 3a              |                    |
| sP371169 | 3,048                   | 2                     | 2a              | 2a     | 2a     | 2a             | 2a             | 2a              | 2a              |                    |
| sP800022 | 10,662                  | 3                     | 3a              | 3a     | 3a     | 3 <sup>2</sup> | 3a             | ND <sup>5</sup> | 3a              |                    |
| sP681788 | 4,559,808               | 2b                    | 2b <sup>3</sup> | 2b     | 2b     | 2b             | 2b             | 2b              | 2b              |                    |
| sP510486 | 38,072                  | 3                     | 3a              | 3a     | 3a     | 3a             | 3a             | 3a              | 3a              |                    |
| sP799685 | 12,168                  | 1a                    | 1a              | 1a     | 1a     | 1a             | 1a             | 1a              | 1a              |                    |
| sP260631 | 29,230                  | 3                     | 3a              | 3a     | 3a     | 3a             | 3a             | 3a              | 3a              |                    |
| sP791266 | 987,104                 | 1b                    | 1b              | 1b     | 1b     | 1b             | 1b             | 1b              | 1b              | 1b                 |
| sP641886 | 628,072                 | 1a                    | 1a              | 1a     | 1a     | 1a             | 1a             | 1a              | 1a              | 1a                 |
| sP759580 | 468,958                 | 1a                    | 1a              | 1a     | 1a     | 1a             | 1a             | 1a              | 1a              | 1a                 |
| sP598047 | 22,754                  | 1b                    | 1b              | 1b     | 1b     | 1b             | 1b             | 1b              | 1b              | 1b                 |
| sP093793 | 1,276,834               | 2                     | 2b              | 2b     | 2b     | 2b             | 2b             | 2b              | 2b              |                    |
| sP181675 | 4,854,384               | 2                     | 2b              | 2b     | 2b     | 2b             | 2b             | 2b              | 2b              |                    |
| sP455229 | 156,258                 | 1b                    | 1b              | 1b     | 1b     | 1b             | 1b             | 1b              | ND <sup>5</sup> |                    |

<sup>1</sup>VL: viral load

<sup>2</sup>Genotype provided by referring laboratories

<sup>3</sup>Sample identification and genotype/subtype identified by amplicon sequencing of NS3 and NS5 regions by PCR at PH

<sup>4</sup>Subtype unidentifiable

<sup>5</sup>Not done – no sequence assembled

***B) Genotype ratio of mixed genotype/subtype transcripts and samples***

| <b>Sample</b> | <b>Type</b>    | <b>GtA:GtB</b> | <b>Ratio</b> |
|---------------|----------------|----------------|--------------|
| HCVG10-02     | Plasma         | 1b:3a          | ≈1:1         |
| HCVG10-04     | Plasma         | 3a:5a          | ≈1:1         |
| JW1           | Plasma         | 1a:3a          | 1:10         |
| JW2           | Plasma         | 1a:3a          | 10:1         |
| JW3           | Plasma         | 1a:3a          | 1:1          |
| sS786324      | Plasma         | 1a:1b          | 1:4          |
| sS589393      | Plasma         | 4d:1b          | 10:1         |
| IVT1          | RNA transcript | 1a:2a          | 1:1          |
| IVT2          | RNA transcript | 1a:2a          | 1:5          |
| IVT3          | RNA transcript | 1a:2a          | 5:1          |
| IVT4          | RNA transcript | 1a:2a          | 1:50         |
| IVT5          | RNA transcript | 1a:2a          | 50:1         |
| IVT6          | RNA transcript | 1a:2a          | 1:500        |
| IVT7          | RNA transcript | 1a:2a          | 500:1        |
| IVT8          | RNA transcript | 1a:2a          | 1:5000       |
| IVT9          | RNA transcript | 1a:2a          | 5000:1       |

TABLE S2

Primers used for sequencing of NS3 and NS5B amplicons

| Genotype | Gene  | Primer name     | Primer sequence (5' to 3')                |
|----------|-------|-----------------|-------------------------------------------|
| 1a       | NS34A | 1a34a-Seq5'3298 | ATG GAG ACC AAG CTC ATC ACG TG            |
| 1a       | NS34A | 1a34a-Seq5'3763 | ACG AGG CAC GCC GAT GTC ATT CC            |
| 1a       | NS34A | 1a34A-Seq5'3922 | CGT GGA GTG GCT AAG GCG GTG GA            |
| 1a       | NS34A | 1a34a-Seq5'4344 | GCA TCG GCA CTG TCC TTG ACC               |
| 1a       | NS34A | 1a34a-Seq5'4762 | GAC CCT ACC TTT ACC ATT GAG AC            |
| 1a       | NS34A | 1a34a-Seq5'5167 | ATC GTG GGA TCA GAT GTG GA                |
| 1a       | NS34A | 1a34a-Seq3'3742 | GAA TGA CAT CGG CGT GCC TCG               |
| 1a       | NS34A | 1a34a-Seq3'3964 | GAG GAG TTG TCC GTG AAC ACC G             |
| 1a       | NS34A | 1a34a-Seq3'4221 | AGG AAC TTG CCG TAG GTG GA                |
| 1a       | NS34A | 1a34a-Seq3'4605 | CTG GTC GGG ATG ACA GAC ACG TC            |
| 1a       | NS34A | 1a34a-Seq3'5107 | TAG TGC ACA CGG TGG CTT GGT               |
| 1a       | NS34A | 1a34a-Seq3'5517 | AGG GCC TTC TGC TTG AAC TGC TC            |
| 1a       | NS5B  | 1a5b-Seq5'7567  | ACG GGT CAT GGT CGA CGG TCA G             |
| 1a       | NS5B  | 1a5b-Seq5'7983  | CA CAT CAA CTC CGT GTG GAA AGA CCT TCT GG |
| 1a       | NS5B  | 1a5b-Seq5'8307  | CCA CAG TCA CTG AGA GCG ACA TCC GTA CGG   |
| 1a       | NS5B  | 1a5b-Seq5'8695  | GAC TTG GAG CTC ATA ACA TC                |
| 1a       | NS5B  | 1a5b-Seq5'9109  | CGC CCT TGC GAG CTT GGA GAC ACC G         |
| 1a       | NS5B  | 1a5b-Seq3'7959  | TCC AGA AGG TCT TTC CAC ACG GAG TT        |
| 1a       | NS5B  | 1a5b-Seq3'8300  | GGT AAA TTG CCT CCT CCG TAC GG            |
| 1a       | NS5B  | 1a5b-Seq3'8625  | GGG GCG GAG TAC CTG GTC ATA GC            |
| 1a       | NS5B  | 1a5b-Seq3'8950  | GTG GTT CTA TGG AGT AGC AGG               |
| 1a       | NS5B  | 1a5b-Seq3'8978  | TGG AGT CTT TGA ATG ATT GGA GGT           |
| 1a       | NS5B  | 1a5b-Seq5'7558  | GAT CTC AGC GAC GGG TCA TGG TC            |
| 1a       | NS5B  | 1a5b-Seq3'9355  | TCG GTT GGG GAG GAG GTA GA                |
| 1a       | NS5B  | 1a5B-seq5'8686  | CAG AAT ACG ACT TGG AGC T                 |
| 1a       | NS5B  | 1a5B-seq3'8995  | GCG CTG AGG CCG TGG AGT C                 |
| 1b       | NS34A | 1b34a-Seq5'5396 | GCG TGG TCA TTG TGG GCA GG                |
| 1b       | NS34A | 1b34a-Seq5'5180 | ATG TGG AAG TGT CTC ATA CGG               |
| 1b       | NS34A | 1b34a-Seq5'4621 | GGT CTT GAT GTG TCC GTC ATA CC            |
| 1b       | NS34A | 1b34a-Seq5'4201 | GAA CTG GGG TAA GGA CCA TCA CCA C         |
| 1b       | NS34A | 1b34a-Seq5'3673 | GTA GAC CAG GAC CTC GTC GGC TG            |

|    |       |                 |                                    |
|----|-------|-----------------|------------------------------------|
| 1b | NS34A | 1b34a-Seq5'3388 | GAG ATA CTT CTG GGA CCG GCC GA     |
| 1b | NS34A | 1b34a-Seq3'5481 | CCT GTT CGA TGT AAG GGA GGT G      |
| 1b | NS34A | 1b34a-Seq3'5073 | AGG TAG GGG AAG TTG TCT CCT GCC TG |
| 1b | NS34A | 1b34a-Seq3'4751 | GGC ACG GTC GTC GTC TCA ATG GTG    |
| 1b | NS34A | 1b34a-Seq3'4409 | CTC GAT GTT GGG ATG TGG CAC G      |
| 1b | NS34A | 1b34a-Seq3'3999 | CCA CTT GGA ATG TCT GCG G          |
| 1b | NS34A | 1b34a-Seq3'3641 | GAG GTC CTG GTC TAC ATT GGT GTA C  |
| 1b | NS5B  | 1b5b-Seq5'7576  | TCT TGG TCT ACC GTG AGC GAG GAG GC |
| 1b | NS5B  | 1b5b-Seq5'7590  | GAG GAG GCy AGT GAG GAC GTC G      |
| 1b | NS5B  | 1b5b-Seq5'7981  | CTC CGT GTG GAA GGA CTT GCT GGA    |
| 1b | NS5B  | 1b5b-Seq5'8330  | GAG TCA ATC TAC CAA TGT TGT GAC    |
| 1b | NS5B  | 1b5b-Seq5'8629  | CGA GTC TTC ACG GAG GCT ATG AC     |
| 1b | NS5B  | 1b5b-Seq5'9021  | CTT AGC GCA TTT TCA CTC C          |
| 1b | NS5B  | 1b5b-Seq3'7960  | GTC TTC CAG CAA GTC CTT CCA CAC GG |
| 1b | NS5B  | 1b5b-Seq3'8153  | CCG TAT GAG GAG CCC ATC ACG        |
| 1b | NS5B  | 1b5b-Seq3'8617  | GAG TAC CTA GTC ATA GCC TCC G      |
| 1b | NS5B  | 1b5b-Seq3'8973  | GTC GTT GAA TGA TCT GAG GTA        |
| 1b | NS5B  | 1b5b-Seq3'9204  | ACG CAG CCG GGA TTG GAG TGA G      |
| 1b | NS5B  | 1b5b-Seq3'9320  | ACA GAA AGT AGG AGT AGG CAC        |

**Figure S1: Read depths (Z-scores) across the genome for different NGS methods**

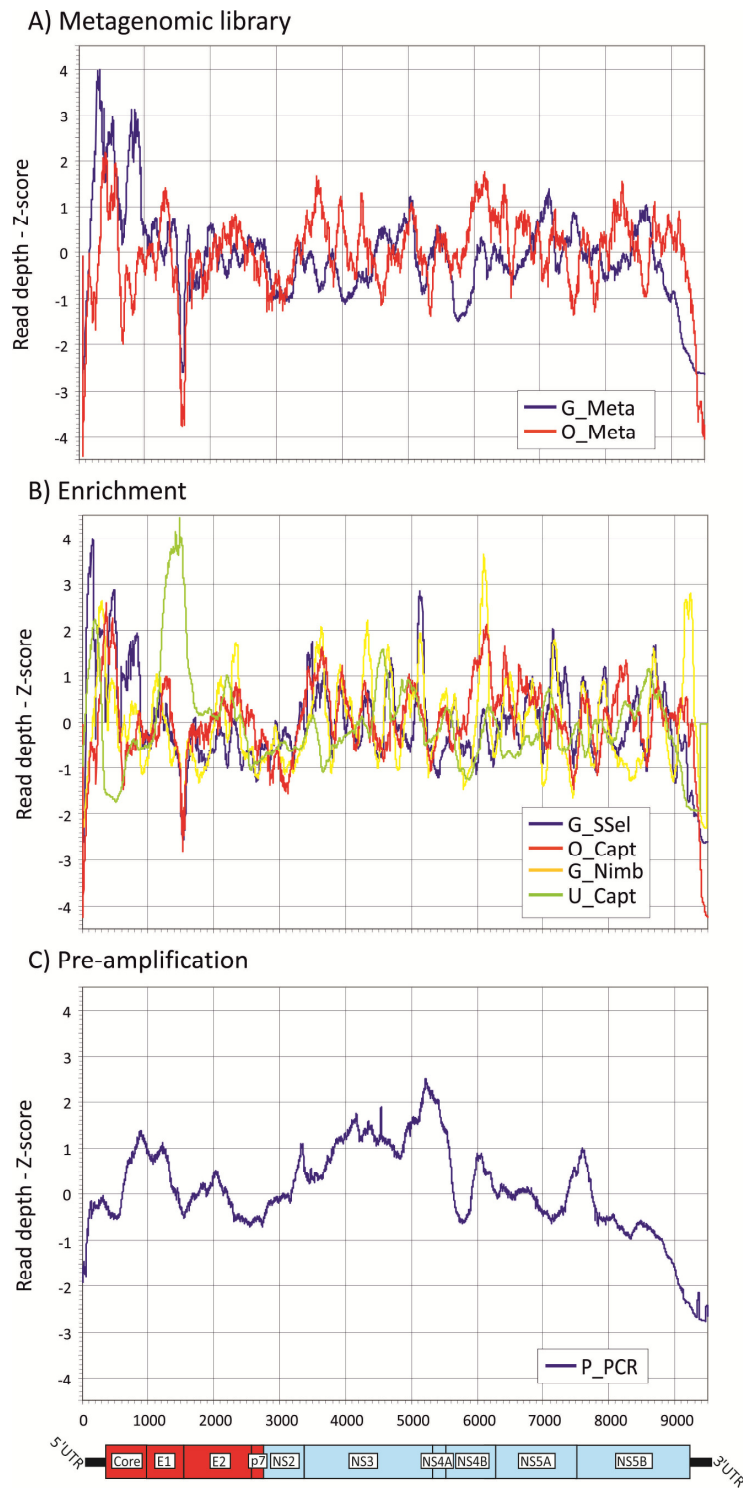

Z-scores of mean coverage across the HCV genome by different NGS methods. Genome positions were based on the H77 reference sequence. A genome diagram of HCV drawn to the same scale as the x-axis is included below.

**Figure S2: Completeness of the consensus sequences at the 5' and 3' ends**

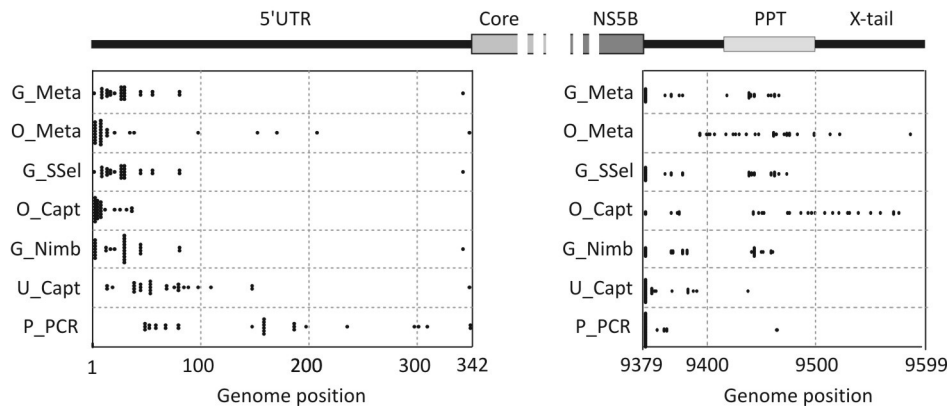

Position of 5' and 3' ends of sequences assembled by different NGS methods, where dots represent termination points for each assembled sequence. For orientation, genome diagrams of the 5'UTR and 3'UTR are shown above. PCR pre-amplification necessarily limited the coverage of the P-PCR method to positions of the nested sense primer in 5' UTRs at 63 (G1a), 169 (G1b and G2), 190 (G3a) and 312 (G4) and anti-sense primer in 3' UTRs at 9395 (G1a), 9370 (G1b), 9295 (G3a) and 9290 (G4). Similarly, the reference sequences used for assembly of sequence reads in the G-Meta, G-SSel and G-Nimb lacked the X-tail sequence beyond the poly-pyrimidine tract (PPT) and could not be assembled beyond this point.

**Figure S3: Sequence divergence between the global consensus and individual sequences of different genotypes generated by NGS**

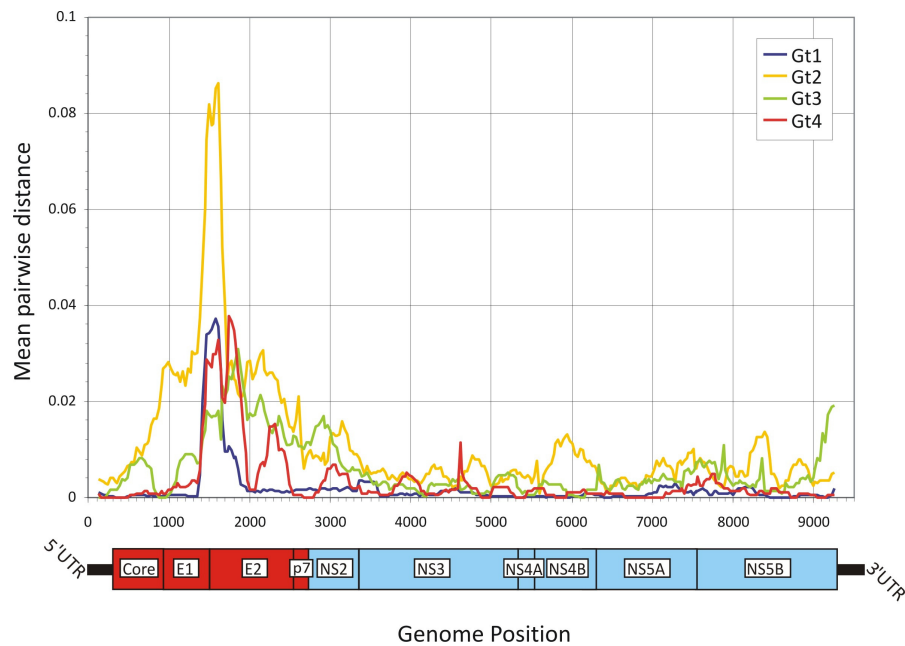

Divergence values were calculated for a sliding window of 250 bases centred on every 30th base. Mean values for sample genotype were plotted for positions homologous to the H77 reference strain. Genomic features of the HCV genome are shown below, with structural genes shown in red.
